# Supplementary material
Source: ML conference proceedings conference paper supplement (https://openreview.net/forum?id=1Y8MXuJlIY)
Supplement: supplementary_material [file supplemental material.docx]

**Supplementary Table 1. Details of eight summarized neuronal subtypes.**

| Abbreviation | Scientific Name | Type | Location | References |
| --- | --- | --- | --- | --- |
| L2P | L2 pyramidal neurons | Excitatory | Upper Layer 2/3 | [1,2,3,4] |
| L3P | L3 pyramidal neurons | Excitatory | Lower Layer 2/3 | [4,5,6] |
| Pyr | Star pyramidal and pyramidal neurons | Excitatory | Layer 4 | [7,8,9,10,11] |
| SSP | Spiny stellate pyramidal neurons | Excitatory | Layer 4 | [6,7,8,12] |
| STP | Slender-tufted pyramidal neurons | Excitatory | Layer 5a | [13,5,14] |
| TTP | Thick-tufted pyramidal neurons | Excitatory | Layer 5b | [15,16,17,18,19] |
| CTP | Cortico-thalamic pyramidal neurons | Excitatory | Layer 6a | [20, 21, 22,23] |
| CCP | Cortico-cortical pyramidal neurons | Excitatory | Layer 6a | [21, 23, 24,25] |

**References:**

[1] Van Brederode JF et al., Morphological and electrophysiological properties of atypically oriented layer 2 pyramidal cells of the juvenile rat neocortex, 2000.

[2] Bureau I et al., Interdigitated paralemniscal and lemniscal path-ways in the mouse barrel cortex, 2006.

[3] Staiger JF et al., A gradual depth-dependent change in connectivity features of supragranular pyramidal cells in rat barrel cortex, 2015.

[4] Sermet BS et al., Pathway-, layer- and cell-type-specific thalamic input to mouse barrel cortex, 2019.

[5] Lefort S et al., The excitatory neuronal networkof the C2 barrel column in mouse primary somatosensory cortex, 2009.

[6] Petersen CC et al., Functionally independent columns of rat somatosensory barrel cortex revealed with voltage-sensitive dye imaging, 2001.

[7] Egger V et al., Subcolumnar dendritic and axonal organization of spiny stellate and star pyramid neurons within a barrel in rat somatosensory cortex, 2008.

[8] Staiger JF et al., Functional diversity of layer IV spiny neurons in rat somatosensory cortex: quantitative morphology of electrophysiologically characterized and biocytin labeled cells, 2004.

[9] Schubert D et al., Cell type-specific circuits of cortical layer IV spiny neurons, 2003.

[10] Brecht M et al., Dynamic representation of whisker deflection by synaptic potentials in spiny stellate and pyramidal cells in the barrels and septa of layer 4 rat somatosensory cortex, 2002.

[11] Moore CI et al., Spatio-temporal subthreshold receptive fields in the vibrissa representation of rat primary somatosensory cortex, 1998.

[12] Feldmeyer D et al., Reliable synaptic connections between pairs of excitatory layer 4 neurons within a single ‘barrel’ of developing rat somatosensory cortex, 1999.

[13] Frick A et al., Monosynaptic connections between pairs of L5A pyramidal neurons in columns of juvenile rat somatosensory cortex, 2008.

[14] Oberlaender M et al., Three-dimensional axon morphologies of individual layer 5 neurons indicate celltype-specific intracortical pathways for whisker motion and touch, 2011.

[15] Chagnac-Amitai Y et al., Burst generating and regular spiking layer5 pyramidal neurons of rat neocortex have different morphological features, 1990.

[16] Connors BW et al., Electrophysiological properties of neocortical neurons in vitro, 1982.

[17] Le Be J-V et al., Morphological, electrophysiological, and synaptic properties of corticocallosal pyramidal cells in the neonatal rat neocortex, 2007.

[18] Markram H, A network of tufted layer 5 pyramidal neurons, 1997.

[19] Molnár Z et al., Towards the classification of subpopulations of layer V pyramidal projection neurons, 2006.

[20] Kumar P et al., Inter- and intralaminar subcircuits of excitatory and inhibitory neurons in layer 6a of the rat barrel cortex, 2008.

[21] Pichon F et al., Intracortical connectivity of layer VI pyramidal neurons in the somatosensory cortex of normal and barrelless mice, 2012.

[22] Qi G et al., Dendritic target region-specific formation of synapses between excitatory layer 4 neurons and layer 6 pyramidal cells, 2016.

[23] Zhang ZW et al., Intracortical axonal projections of lamina VI cells of the primary somatosensory cortex in the rat: a single-cell labeling study, 1997.

[24] Narayanan RT et al., Beyond columnar organization: cell type- and target layer-specific principles of horizontal axon projection patterns in rat vibrissal cortex, 2015.

[25] Mercer A et al., Excitatory connections made by presynaptic cortico-cortical pyramidal cells in layer 6 of the neo-cortex, 2005.
